# Supplementary material for: Solution-processable semiconducting thin-film transistors using single-walled carbon nanotubes chemically modified by organic radical initiators
Source: Royal Society of Chemistry journal article supplement (doi:10.1039/b915508b), 2009-01-01

## *Supporting Materials*

### **Solution-Processable Semiconducting Thin-Film Transistors Using Single-Walled Carbon Nanotubes Chemically Modified by Organic Radical Initiators**

*Jianwen Zhao<sup>1,2</sup>, Chun Wei Lee<sup>1</sup>, Xuanding Han<sup>1</sup>, Fuming Chen<sup>1</sup>, Yanping Xu<sup>1</sup>, Yizhong Huang<sup>1</sup>, Mary B. Chan-Park<sup>2</sup>, Peng Chen<sup>2\*</sup> and Lain-Jong Li<sup>1\*</sup>*

<sup>1</sup>School of Materials Science and Engineering, Nanyang Technological University 50, Nanyang Ave. Singapore, 637819

<sup>2</sup>School of Chemical and Biomedical Engineering, Nanyang Technological University, Singapore 637459.

\*E-mail: [lili@ntu.edu.sg](mailto:lili@ntu.edu.sg) ; [chenpeng@ntu.edu.sg](mailto:chenpeng@ntu.edu.sg)

#### **Experimental Section:**

**Radical Reaction:** The purified SWeNT@SG 65 tubes were purchased from SouthWest Nanotechnologies (USA) and directly used. To obtain SWNT suspension, 0.3 mg of SWNTs was dispersed in 30 mL of DMF solution via probe-ultrasonication for 30 min (Sonics & Materials Inc., Model: VCX 130). Then, 1 mL of DMF solution containing 25 mg/mL ACN was added to 10 mL SWNT suspension, followed by 30 min ultrasonication. After reacton with ACN, the suspension was filtered through a 0.25  $\mu\text{m}$  PTFE membrane, followed by repeated washing with DMF and acetone to remove the residuals. The powders collected from PTFE membrane were re-dispersed in a 2 wt % of co-surfactants which consists of sodium dodecyl sulfat (SDS) and sodium cholate hydrate (SC) (weight ratio=1:4). The nanotube bundles in the suspension were removed by centrifugation at 20000 rpm for 90 min. The resulting supernatant was then used for fabrication of thin-film field-effect transistors (FETs).

**Fabrication of FET devices:** The SWNT FETs (SNFETs) were fabricated by drop-casting the suspension of modified SWNTs across two Au electrodes (100 nm thick) pre-patterned on top of SiO<sub>2</sub>/Si substrate to form conducting channel  $\sim$ 50  $\mu\text{m}$  long and  $\sim$ 25  $\mu\text{m}$  wide. The gate dielectrics SiO<sub>2</sub>

is 300 nm thick. For the drop-cast procedure, 25  $\mu\text{L}$  of SWNT suspension was dropped onto the devices, followed by drying at room temperature and rinsing of de-ionized water. The procedure was repeated until the density of ACN- functionalized SWNTs is high enough to reach the desired current level.

**Estimation of device mobility:** The effective field-effect mobility is estimated by

$\mu = 10^4 \times \frac{I_d}{V_{gs}} \times \frac{L}{W} \times \frac{1}{C_{ox} V_{ds}}$ . Here,  $C_{ox}$  is determined by  $\epsilon_0 \epsilon_r A/d$ , where  $\epsilon_0$  is permittivity of free space

( $8.85 \times 10^{-12}$ ),  $\epsilon_r$  is relative permittivity (3.9),  $A$  is unit area and  $d$  is the gate silicon oxide thickness ( $3 \times 10^{-7}$ ).  $L$  and  $W$  represent the channel long (50  $\mu\text{m}$ ) and wide (25  $\mu\text{m}$ ), respectively. The effective hole mobility of the device in [Figure 2a \(main text\)](#) is calculated as follows:

$$\mu = 10^4 \times \frac{I_d}{V_{gs}} \times \frac{L}{W} \times \frac{1}{C_{ox} V_{ds}} = 10^4 \times 1.22 \times 10^{-7} \times 2 \times \frac{1}{1.15 \times 10^{-4} \times 2} = 10.6 \text{ cm}^2/\text{Vs}.$$

**Measurements:** All electrical measurements were performed under ambient conditions using a Keithley semiconductor parameter analyzer, model 4200-SCS. XPS measurements were carried out by a Kratos AXIS-ultra spectrometer (UK) with the monochromatic Al  $K_{\alpha}$  X-ray radiation (1486.71 eV). The Raman spectra were performed in a WITec CRM200 confocal Raman microscopy system (laser wavelength 488nm and laser spot size is  $\sim 0.5 \mu\text{m}$ ) and Si peak at  $520 \text{ cm}^{-1}$  was used as a reference for wavenumber calibration. Transmission electron microscope (TEM) was performed with a Hitachi JEOL JEM-2100F. Optical absorption measurements were performed in a Perkin Elmer Lambda 9 UV-Vis-NIR spectrometer.

**Figure S1.** . Absorption spectra of the pristine and ACN-modified SWNTs deposited on Si substrates from the SWNTs after re-dispersing in a 2 wt % of co-surfactants (SDS: SC = 1:4 in weight). The initial weight ratio of SWNTs and ACN is 1:250.

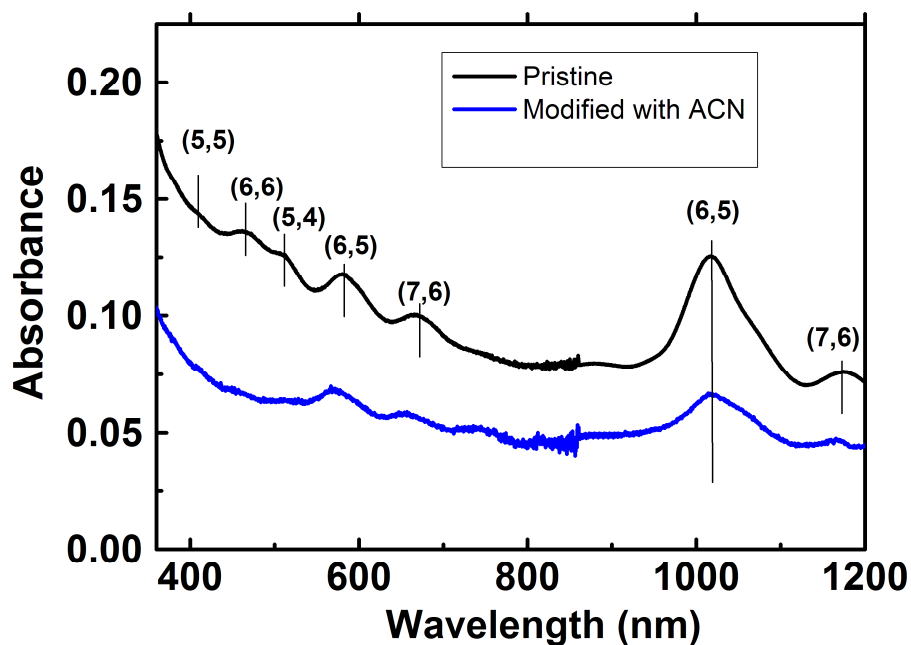

**Figure S2.** (a) Out put characteristics of the device as discussed in Figure 2a (main text). (b) The transfer curve of the same device, where the current is plotted in a linear scale.

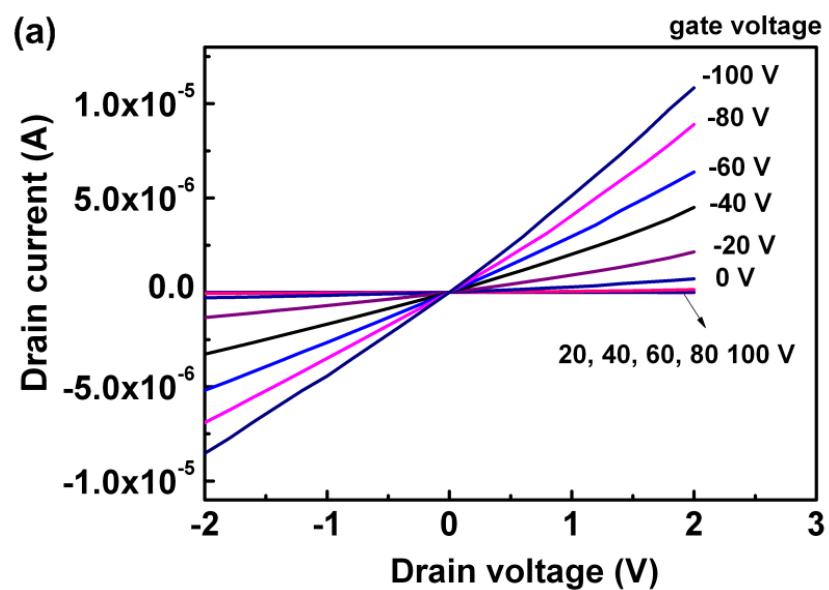

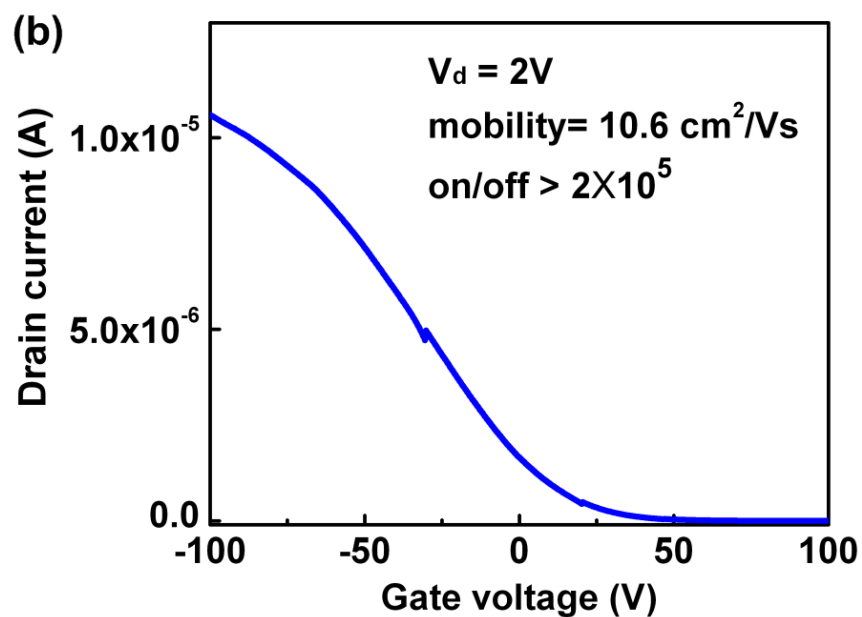

**Figure S3.** Relation between on-off ratio and hole mobility for the devices fabricated from ACN-functionalized SWNTs.

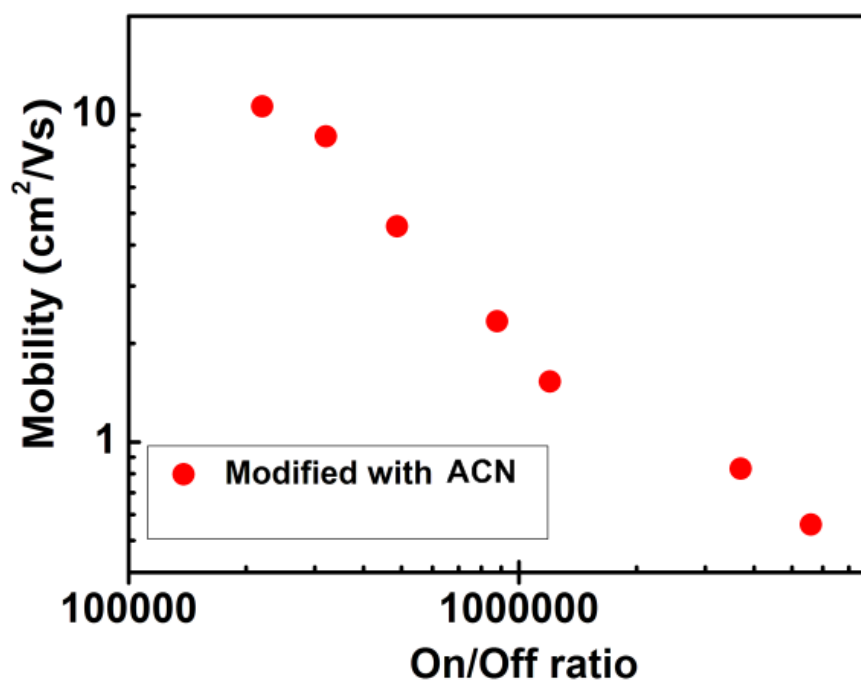

**Figure S4.** Transfer curves of a device prepared from ACN-modified tubes before and after vacuum annealing at 300°C for 2hr. It is noted that organic functional groups on SWNT surface can be removed by thermal annealing at above 300°C [So et al. *J. Am. Chem. Soc.* **2007**, 129, 4866.]. If the ACN-modified metallic tubes are present in the conduction path, the metallic tubes shall be recovered and these devices are expected to become less gate-dependent after thermal annealing. The result here clearly demonstrates that the metallic tubes are still physically present in the networks.

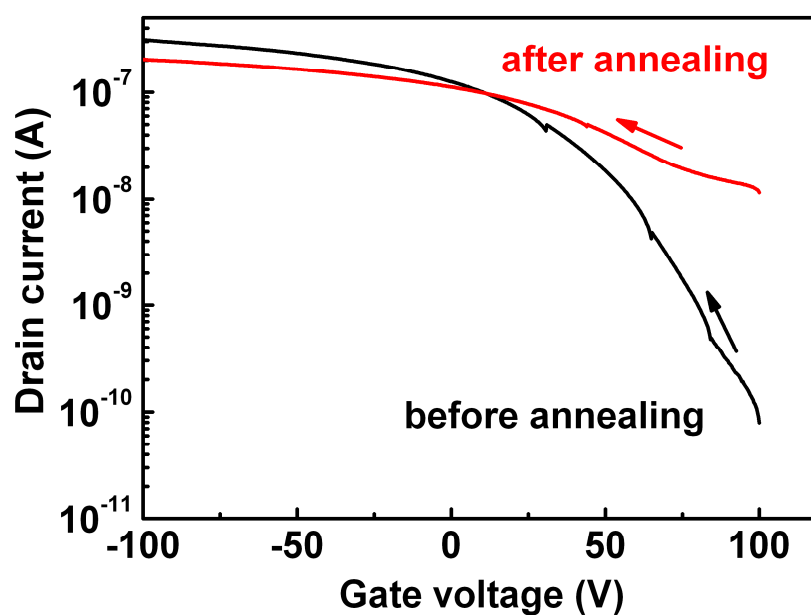

Supplement: b915508b.pdf [file b915508b.pdf]
